# Supplementary material
Source: Springer Nature journal article supplement (https://www.springermedizin.de/resource/supplementary/13002_2010_190_MOESM2_ESM.pdf/9627346)

C A S E 0 5 10 15 20 25  
Label +-----+-----+-----+-----+

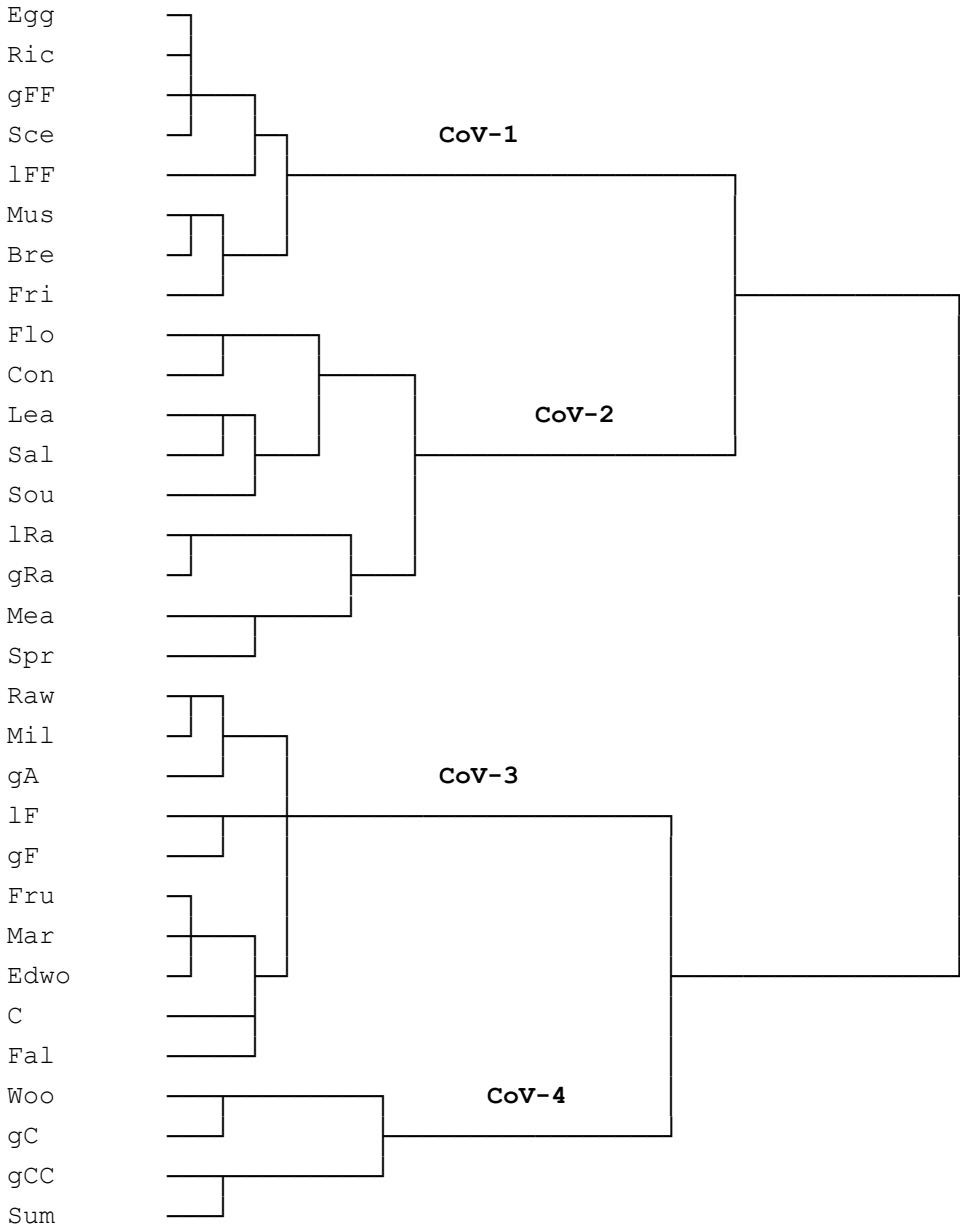

Supplement: MOESM2 [file 9627346]
